# Supplementary material
Source: PubMed Central journal article supplement (PMC3852926)
Supplement: mmc1.pdf [file mmc1.pdf]

The American Journal of Human Genetics, Volume 93

## Supplemental Data

### Loss-of-Function Mutations in *TBC1D20* Cause Cataracts and Male Infertility in *blind sterile* Mice and Warburg Micro Syndrome in Humans

Ryan P. Liegel, Mark T. Handley, Adam Ronchetti, Stephen Brown, Lars Langemeyer, Andrea Linford, Bo Chang, Deborah J. Morris-Rosendahl, Sarah Carpanini, Renata Posmyk, Verity Harthill, Eamonn Sheridan, Ghada M.H. Abdel-Salam, Paulien A. Terhal, Francesca Faravelli, Patrizia Accorsi, Lucio Giordano, Lorenzo Pinelli, Britta Hartmann, Allison D. Ebert, Francis A. Barr, Irene A. Aligianis, and Duska J. Sidjanin

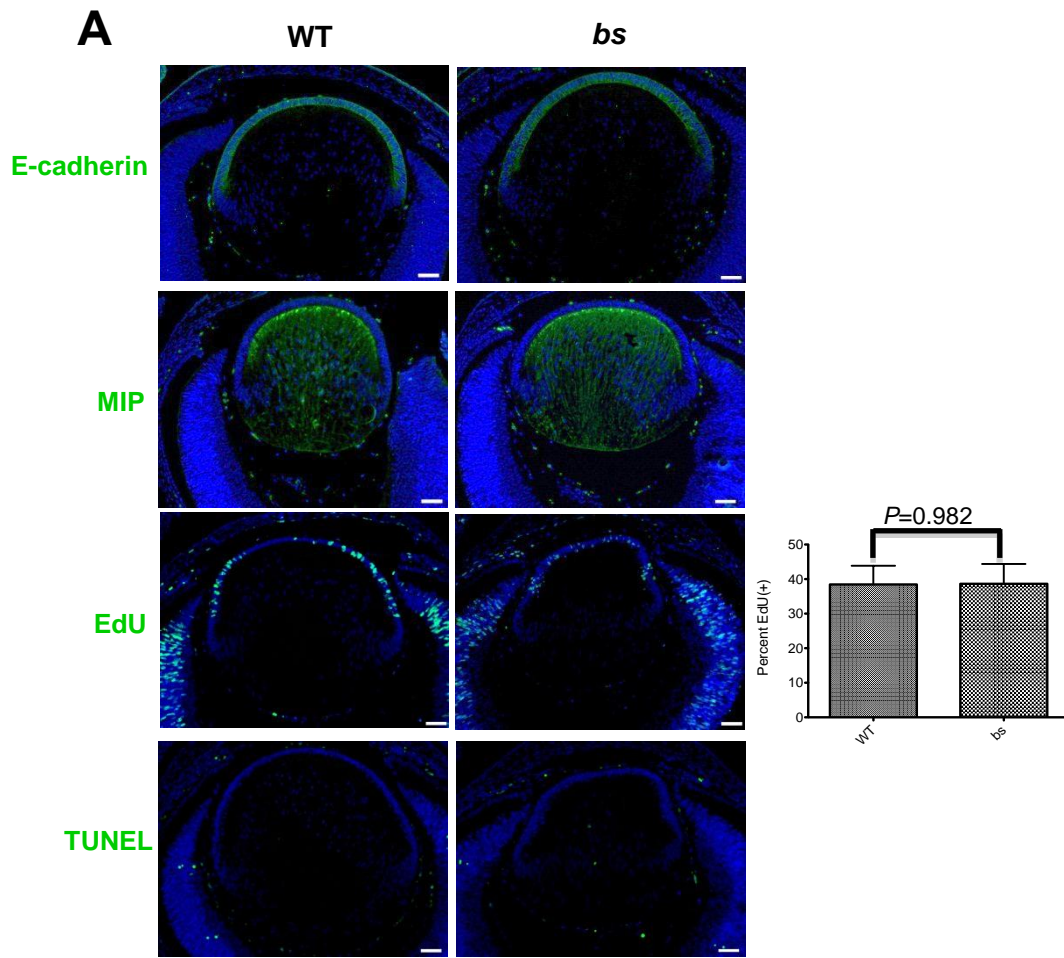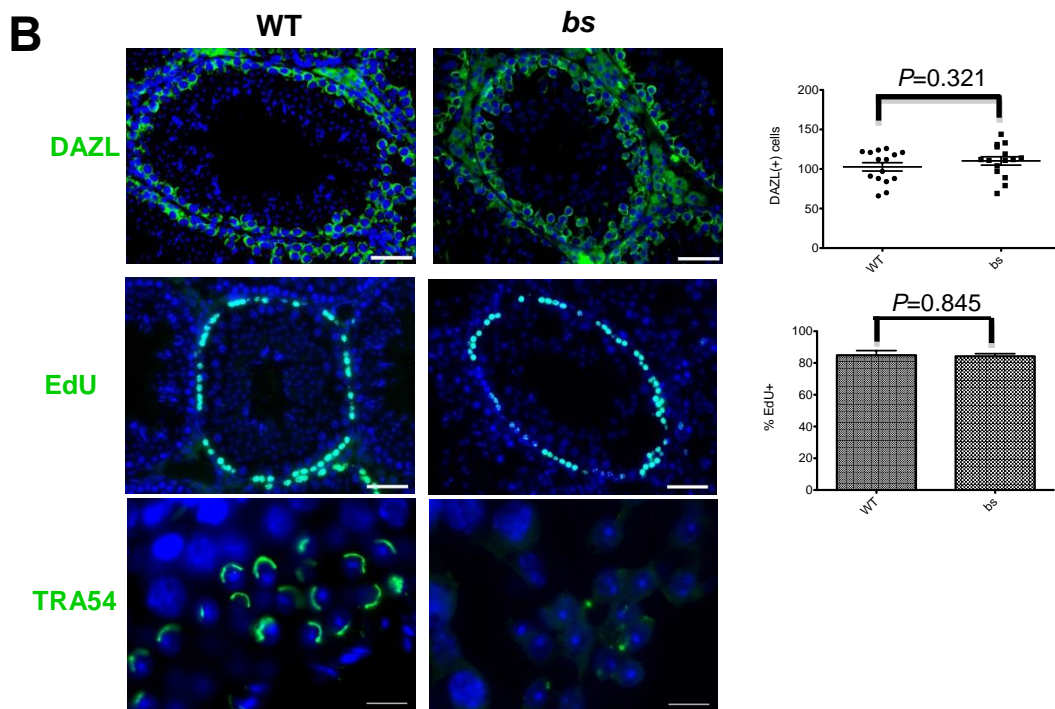

**Figure S1:** *bs* lens and testicular phenotypes. **(A)** Immunostaining with E-cadherin (top panel) and MIP (second panel) did not reveal any abnormalities in E15.5 *bs* lens epithelial and fiber cells respectively; the number of EdU(+) cells (n=3, third panel) and the number of TUNEL(+) cells (n=3, fourth panel) did not significantly differ between E15.5 WT or *bs* lenses. **(B)** The number of spermatogonia and Sertoli cells following DAZL immunostaining (top panel) did not significantly differ between WT and *bs* tubules (n=15); the number of EdU-positive cells (middle panel) did not differ between WT and *bs* tubules (n=15). Scale bars = 25  $\mu$ m. Crescent-shaped TRA54 immunostaining (bottom panel) of spermatids was evident in WT, whereas in *bs* TRA54 positive immunostaining revealed presence of small punctae. Scale bars = 5  $\mu$ m. *P* values were determined by Student's *t* test and are shown on top of each graph and error bars represent SEM.

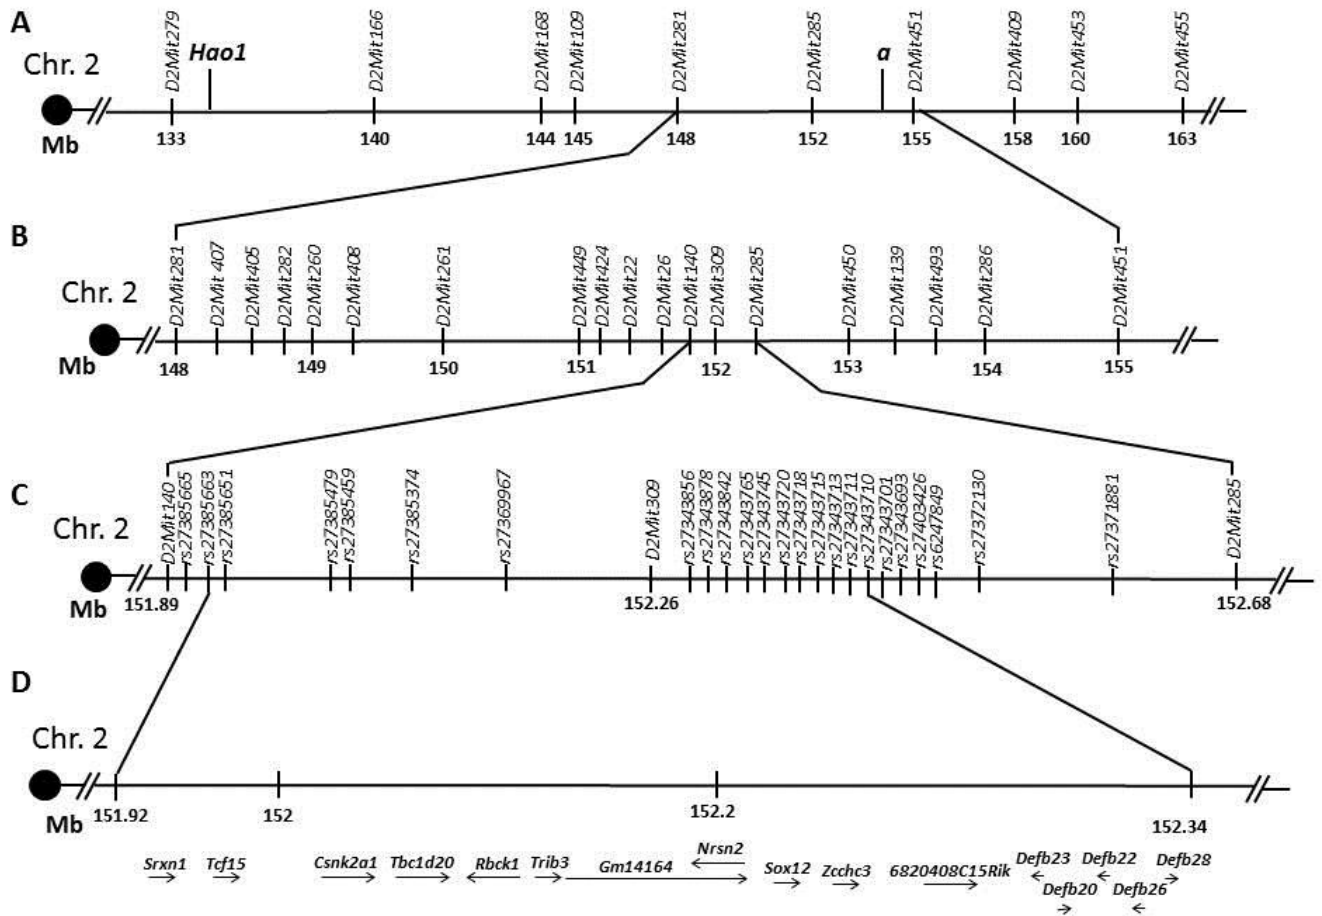

**Figure S2:** Positional cloning of the *bs* locus. **(A)** Initial microsatellite mapping assigned the *bs* mutation to the region between *D2Mit281* and *D2Mit451*. **(B)** Subsequent fine mapping identified additional recombinants which further narrowed the *bs* region to between *D2Mit140* and *D2Mit285*. **(C)** SNP markers refined the *bs* critical region to between rs27385663 and rs27343710. **(D)** The 416kb *bs* critical region contained 14 known genes and 2 hypothetical genes.

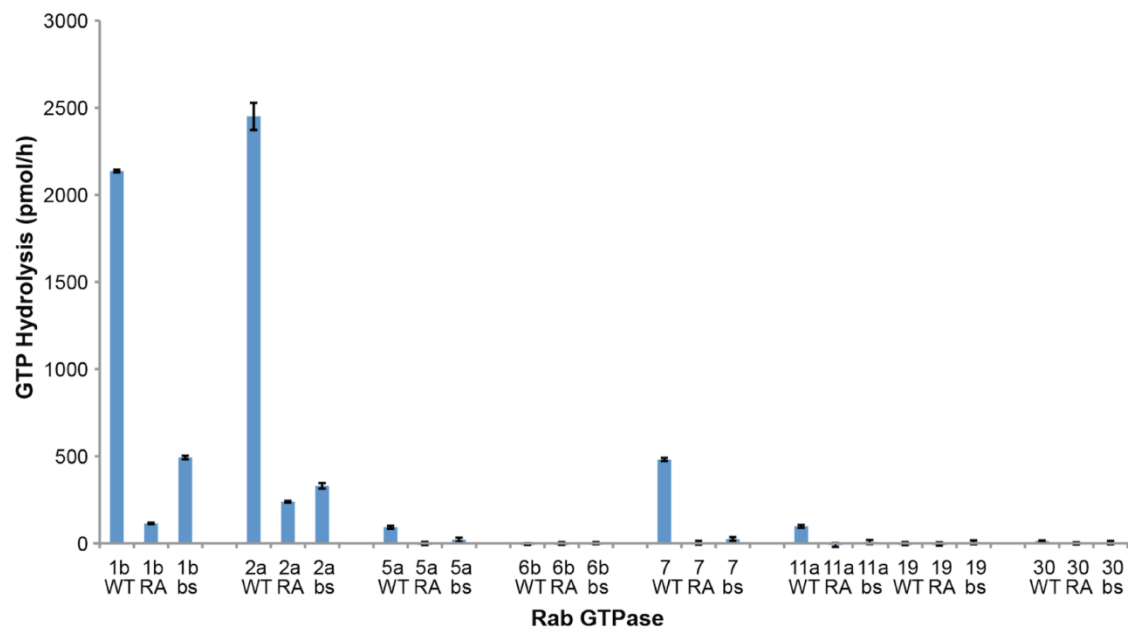

**Figure S3:** TBC1D20 mediated GTP hydrolysis screen. The biochemical analysis revealed that WT mouse TBC1D20 has a high activity towards RAB1 and RAB2 and only a residual activity towards several other RABs . The mutant TBC1D20-bs shows residual activity towards RAB1 and RAB2 similarly to the previously characterized RA mutant. Each point on the graph represents the mean values from three independent experiments and error bars indicate SD.

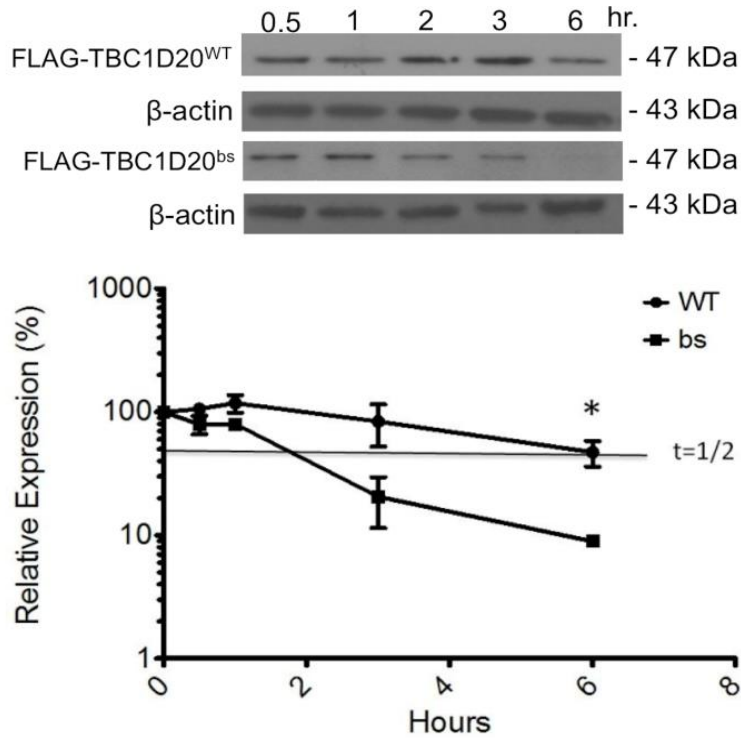

**Figure S4:** Stability of TBC1D20<sup>WT</sup> and TBC1D20<sup>bs</sup> proteins. Western blots of HEK 293 cell lysates transiently transfected with FLAG-tagged *Tbc1d20*<sup>WT</sup> or *Tbc1d20*<sup>bs</sup> clones treated with cycloheximide. 6 hr following the treatment there was significantly ( $P < 0.05$ ) less FLAG-TBC1D20<sup>bs</sup> protein than FLAG-TBC1D20<sup>WT</sup> protein relative to  $\beta$ -actin. Each point on the graph represents the mean values from three independent western blots done in triplicates and error bars represent SEM.

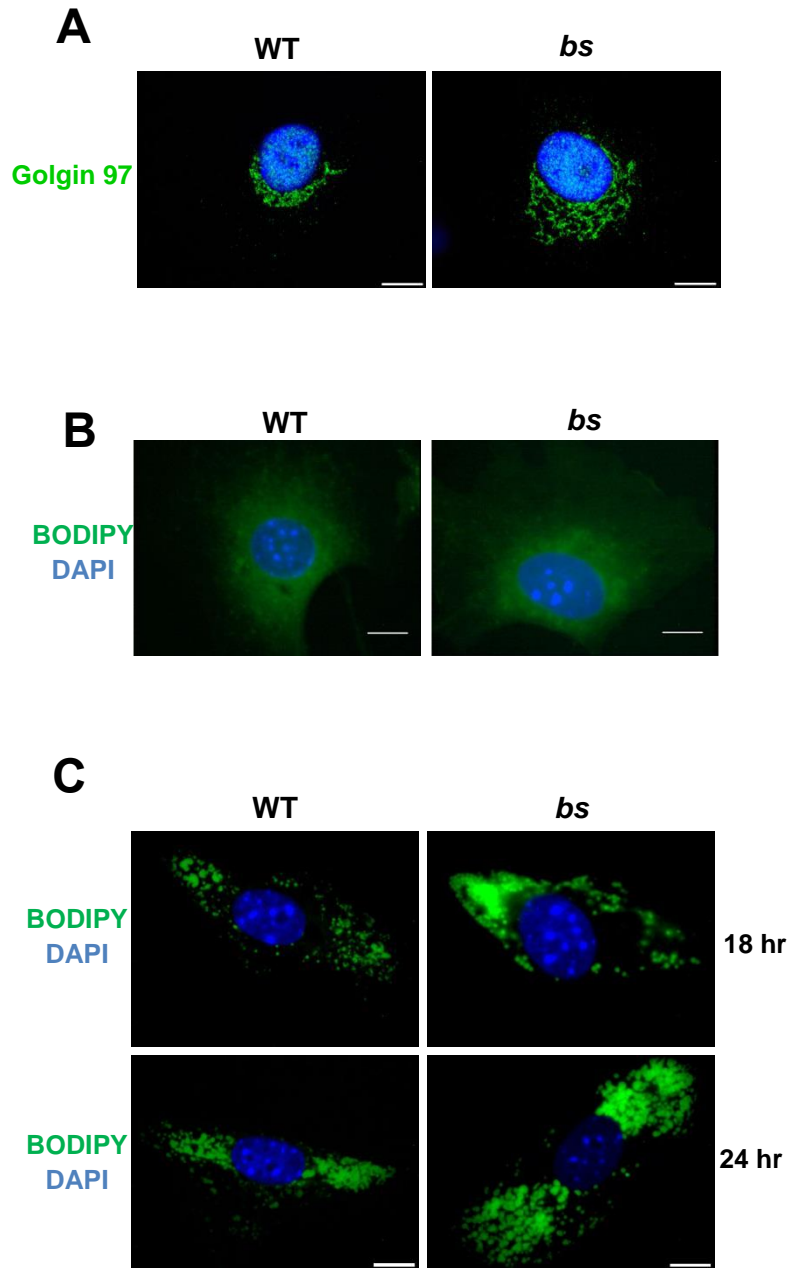

**Figure S5:** Cellular phenotypes of WT and *bs* mEFs. Enlarged *trans*-Golgi (A) were observed following immunostaining with golgin-97 (green) in *bs* when compared to WT mEFs. (B) Staining of WT and *bs* mEFs with BODIPY 493/503 did not identify LDs in either cell line. However, oleic acid treatment (C) for 18 hr (top panel) and 24 hr (bottom panel) following staining with the neutral lipid dye BODIPY 493/503 (green) revealed expanded LD structures in *bs* when compared to WT mEFs,. DNA was stained with DAPI (blue). Scale bars = 5  $\mu$ m.

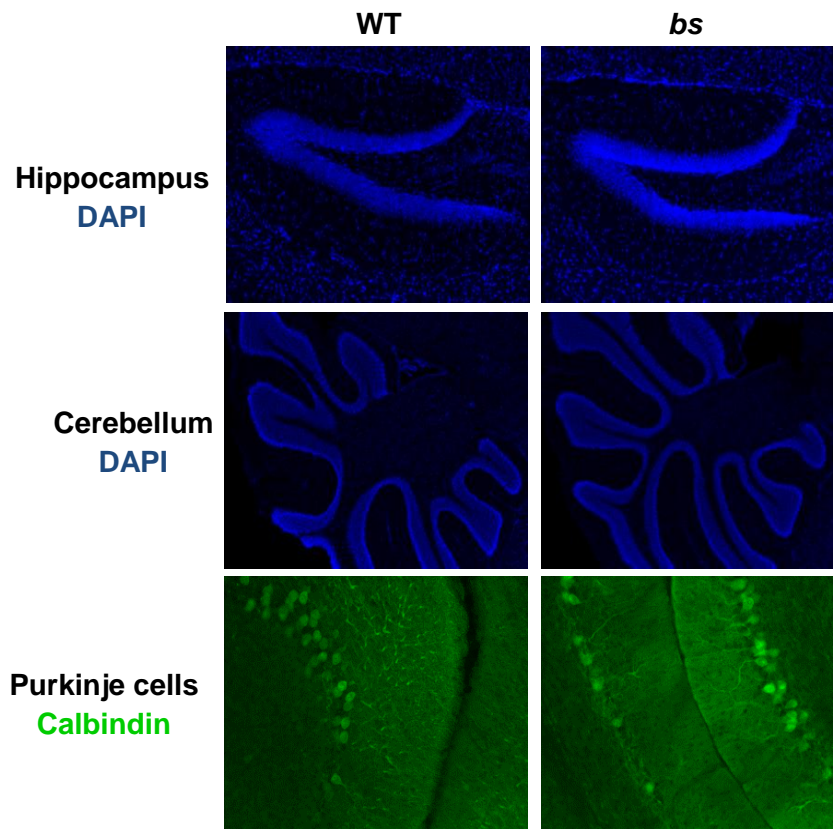

**Figure S6:** *bs* brain phenotypes. No obvious morphological abnormalities were noted in adult *bs* brains following DAPI staining of hippocampus (top panel) and cerebellum (middle panel). No difference in Purkinje cell morphology was noted between WT and *bs* following calbindin staining (bottom panel).



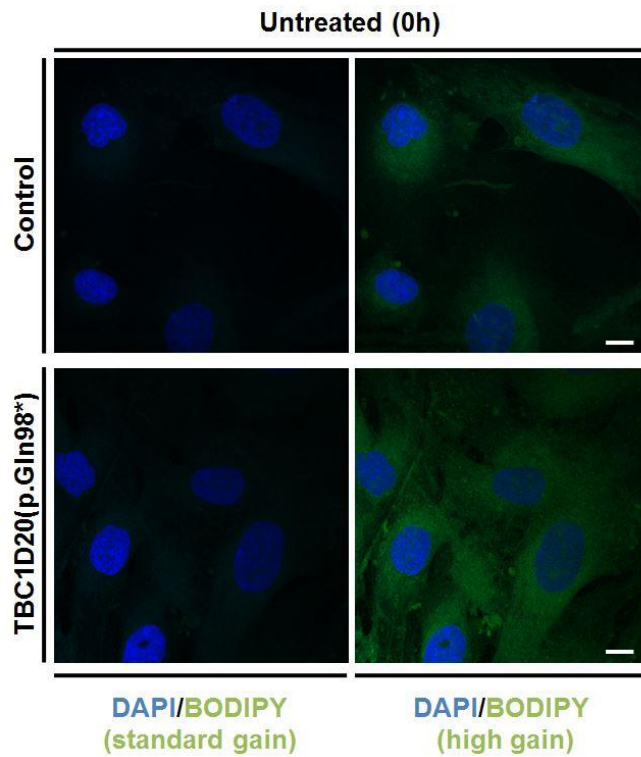

**Figure S7:** BODIPY 493/503 staining of untreated control and TBC1D20 (p.Gln98\*) human fibroblasts. Cells were stained using the neutral lipid dye BODIPY 493/503 (green) and DNA was stained with DAPI (blue). Using standard gain to measure BODIPY fluorescence (as when cells were treated with oleic acid), very little fluorescent signal was recorded (left panels). Using higher gain (right panels), fluorescent signal was recorded but did not identify LDs in these cells. Scale bars = 10  $\mu$ m.

**Table S1.** 16 RefSeq candidate genes identified in the *bs* critical region

| Gene symbol    | Gene name                                          | RefSeq accession no. |
|----------------|----------------------------------------------------|----------------------|
| Srxn1          | sulfiredoxin 1 homolog ( <i>S. cerevisiae</i> )    | NM_029688.5          |
| Tcf15          | transcription factor 15                            | NM_009328.2          |
| Csnk2a1        | casein kinase 2, alpha 1 polypeptide               | NM_007788.3          |
| Tbc1d20        | TBC1 domain family, member 20                      | NM_024196.3          |
| Rbck1          | RanBP-type and C3HC4-type zinc finger containing 1 | NM_001083921.1       |
| Trib3          | tribbles 3 homolog ( <i>Drosophila</i> )           | NM_175093.2          |
| Gm14164*       | predicted gene 14164                               | NR_033505.1          |
| Nrsn2          | neurensin 2                                        | NM_001009948.1       |
| Sox12          | SRY-box containing gene 12                         | NM_011438.2          |
| Zcchc3         | zinc finger, CCHC domain containing 3              | NM_175126.4          |
| 6820408C15Rik* | RIKEN cDNA 6820408C15 gene                         | NM_177656.3          |
| Defb23         | defensin beta 23                                   | NM_001037933.2       |
| Defb20         | defensin beta 20                                   | NM_176950.3          |
| Defb22         | defensin beta 22                                   | NM_001002791.2       |
| Defb26         | defensin beta 26                                   | NM_001039120.2       |
| Defb28         | defensin beta 28                                   | NM_001037502.2       |

**Table S2.** Mouse primer sequences

| Primer target/name       | Sequence 5'→3':              |
|--------------------------|------------------------------|
| 6820408C15Rik cDNA 1065F | G TTCAGATCGCCAGCCACATAC      |
| 6820408C15Rik cDNA 1236R | G GGGTTTCTGAGTATTCACGACCA    |
| 6820408C15Rik cDNA 1556R | T CTTGTAAGTCACCAGCCGGAAC     |
| 6820408C15Rik cDNA 371F  | C ACCGGTATCTGGAGACAGCCTA     |
| 6820408C15Rik cDNA 741F  | T ACAGCCACGAAGGCTACCTCAG     |
| 6820408C15Rik cDNA 860R  | C CCGAGGATACTCTGCTGCTGTA     |
| Ccna1 cDNA F             | T TCTGGAAGCTGACCCATTC        |
| Ccna1 cDNA R             | G GCAAGGCACAATCTCATT         |
| Clgn cDNA F              | A GAATGGGAGGCACCACATA        |
| Clgn cDNA R              | T CTGGGTTGGGAATCTTCTG        |
| Crem cDNA F              | G CGACAACCGCATCAGAG          |
| Crem cDNA R              | T CCTTCCCTGTTTTCTTATTT       |
| Csnk2a1 cDNA 1066F       | T TCAACGATATCTTGGGCAGACA     |
| Csnk2a1 cDNA 1081R       | C CAAGATATCGTTGAAACGTGGA     |
| Csnk2a1 cDNA 1267R       | A ACTCATTTCGAGCCTGGTCCTTC    |
| Csnk2a1 cDNA 1551R       | T CAGACACGGTGCTTCTGAAGTG     |
| Csnk2a1 cDNA 582F        | A ACCCCTGCCTTGGTTTTTGAAC     |
| Csnk2a1 cDNA 899F        | T GGATATGTGGAGCTTGGGTTGT     |
| D2Mit109 F               | C CTCTCCAATCAGTCACATGG       |
| D2Mit109 R               | T TGTCTTACCTTCATCAGAGATGC    |
| D2Mit136 F               | C CCCACATAGGAAACACAGC        |
| D2Mit136 R               | A TCTTCACATATGCATGTATACTTGTG |
| D2Mit139 F               | A GATGTAAAGGTCATCTCTCAGCC    |
| D2Mit139 R               | A GAAGCAAGGGCAACTTCAA        |
| D2Mit140 F               | C TGCCTCCTGTTTTGAAAGC        |
| D2Mit140 R               | G ACATGTATACACGTGTGCGC       |
| D2Mit166 F               | A TCTGCCTCAAGATACTAAGTAGATGC |
| D2Mit166 R               | G TTGTATATGTATATGTGCAACACACA |
| D2Mit168 F               | C TCACAGACACTGCACTATTACACA   |
| D2Mit168 R               | T GTTCCTGCTATTGTTTTGGG       |
| D2Mit194 F               | C TCACAGACACTGCACTATTACACA   |
| D2Mit194 R               | T GTTCCTGCTATTGTTTTGGG       |
| D2Mit22 F                | G CTCCCTTTCCTCTTGAACC        |
| D2Mit22 R                | G GGCCTTATTCTATCTCCC         |
| D2Mit26 F                | T GTTCTTTGCTCATCCACCA        |
| D2Mit26 R                | A GGCTGATGGTAACAGTGGG        |
| D2Mit260 F               | A CATAGAAACAAGCATAACATGCA    |
| D2Mit260 R               | C TGTGGTAAACTTTAAATAATGGTGG  |

|                        |                             |
|------------------------|-----------------------------|
| D2Mit261 F             | TGAACCCTGGGCTTAATCAC        |
| D2Mit261 R             | AAACCCTGTCTCAAAAAAAAAAGG    |
| D2Mit281               | TTAGCATGACATGATGGATACTCC    |
| D2Mit281               | TCACATCTCAGAGGGGCTG         |
| D2Mit282 F             | GCAACCCTCAAACATACTCCATG     |
| D2Mit282 R             | CTCTTCACAGATTCCCCCTG        |
| D2Mit285 F             | TCAATCCCTGTCTGTGGTAGG       |
| D2Mit285 R             | TATGACACTTACAAGGTTTTTGGTG   |
| D2Mit286 F             | GGCCATGCTCTTTTTTTTACC       |
| D2Mit286 R             | CCCTGTGCTCTTGCTTTTTTC       |
| D2Mit309 F             | ACAAATGCCACTCTCACATCC       |
| D2Mit309 R             | TATTTCTCAGAGTCACTAGGAGTGATG |
| D2Mit405 F             | TGATTATATCTTGGAAATACACGTGTG |
| D2Mit405 R             | CTGTGTAGCAAACAGTTTATGGC     |
| D2Mit407 F             | AAAGAGAGAATACTCTCAAAGTCCG   |
| D2Mit407 R             | GAAGGTCTGCAGGTTTGGTC        |
| D2Mit408 F             | TGCTCACATCATGCCCTTAA        |
| D2Mit408 R             | CATTTTAGGCATGTGCATGG        |
| D2Mit409 F             | CAACGTGTTTTCAGTCTAAGAGATG   |
| D2Mit409 R             | AAGAGAAGGTAATCACAAACCCC     |
| D2Mit424 F             | CACCCTAAGTTGTCCTCACATG      |
| D2Mit424 R             | GCCTCATCTATAGATTGTGTGCA     |
| D2Mit449 F             | GTATCCAAAGTCTGCCACTTCC      |
| D2Mit449 R             | CTCCTCAGAACCCACACAT         |
| D2Mit450 F             | AGGAATTTCTGCTATTCCTCATATAA  |
| D2Mit450 R             | AAGAGTTTTAAGTAAGGGTTGTAGACC |
| D2Mit451 F             | CATTAGATAGACTGGGCAAGGG      |
| D2Mit451 R             | TCCTCCCTCCAAACCCTC          |
| D2Mit453 F             | CCTGAAATTTCCCTTCATAGTAGG    |
| D2Mit453 R             | GAAGACACCCACAAGACTAATGC     |
| D2Mit493 F             | GTCTCTACCTGAGTTTCCATCACA    |
| D2Mit493 R             | TCCCGAGTTGTCCCTCTATG        |
| D2Mit494 F             | TGAGTCGAGGCAGATGGG          |
| D2Mit494 R             | TTCTTCTCCTGGGATTGTGG        |
| D2Mit495               | AGACCCTGTCTCACACCACC        |
| D2Mit495               | ATGTGGTCCTGATTTTTGGG        |
| D2Mit57                | CCTCACAACATATGTCAGGTAATGG   |
| D2Mit57                | GGATGAGGGATTAATAATAGATGC    |
| Defb20 Exon 1F (398bp) | GCTCCCTGTCTGTCCATGTGAGT     |
| Defb20 Exon 1R         | TGAGATAGCCGGAGCTGAAAATG     |
| Defb20 Exon 2F (471bp) | TGTCTGCTGTCTCTCCCTGTGAA     |

|                    |                            |
|--------------------|----------------------------|
| Defb20 Exon 2R     | ACAAGGAGCGGATACAGGCAAAA    |
| Defb22 cDNA 2F     | GAACCTACTGCCTACTGACAGG     |
| Defb22 cDNA 601R   | GGATATTAGGTCAGGAGAAAAGAGG  |
| Defb23 cDNA 1F     | AGACCCCGGGCTTTTCTAC        |
| Defb23 cDNA 594R   | CCCAGGAGAAAGACCTGCTA       |
| Defb26 cDNA 152F   | CTGCAGAGTCCGATGTCAAG       |
| Defb26 cDNA 646R   | GGGAGGTGTTTCATATCCCAGA     |
| Defb26 Exon 1F     | ACAGCAGGCTCACTTCTCCCATT    |
| Defb26 Exon 2F     | TCTAGAGGGCAGAGGTTTCGGTTT   |
| Defb26 Exon 2R     | GGGTGTTTTAGAGTCATTTGCATCC  |
| Defb26 Exon1R      | TGAAATGATGCTTCTCACCACCA    |
| Defb28 EXON1 F     | CCTTGGCCTTCCTCAGATTT       |
| Defb28 EXON1 R     | GATCATACCCAGAGCCTCACA      |
| Defb28 EXON2 F     | GTCTCCCTGAACCCACCATT       |
| Defb28 EXON2 R     | ACCCATGTCAAGACCCCTTT       |
| Defb28 EXON3 F     | AAACCCAGTCTCCAGAAT         |
| Defb28 EXON3 R     | TTTCAGATTTGAGTTTCAGGACA    |
| Gm14164 EXON 5.1 F | TGTGCATGCTGGGAGTTTAATACA   |
| Gm14164 EXON 5.1 R | CCAGTGTGGAGGAAAGTACATGG    |
| Gm14164 EXON 5.2 F | TGCCATCCCTTTGTCTTACCTT     |
| Gm14164 EXON 5.2 R | CCCTATTTCCAGACAAGGTCGT     |
| Gm14164 EXON 5.3 F | TGTCCGCCTGAGTGTTTTCTCTG    |
| Gm14164 EXON 5.3 R | TGAGGGGGAACATAAGGATCTCTC   |
| Gm14164 EXON 5.4 F | TCAGAGTCACCTCTCCCCTTTGA    |
| Gm14164 EXON 5.4 R | GGATTCTGGTGTCTCGCTGATTG    |
| Gm14164 EXON1 F    | CCAGGGCAGTGGGATTGTTATTT    |
| Gm14164 EXON1 R    | TGGCTTTGAACTTAGAGATCTGATGG |
| Gm14164 EXON2 F    | TAGCCATGATTGGCTCCAAACTC    |
| Gm14164 EXON2 R    | GTTCTGCCAACAGGACAATGGAC    |
| Gm14164 EXON3 F    | CAACTTTCCTATGCCGCAGTGAC    |
| Gm14164 EXON3 R    | GTCGGATCCTGTCTCTGGCAAC     |
| Gm14164 EXON4 F    | CCAGCTCTGTTTGGCACTCCTC     |
| Gm14164 EXON4 R    | CCCCAACCTCCCACCTTAAGAAC    |
| Nrsn2 EXON2 F      | AAAACACTCAGGCGGACAGACAG    |
| Nrsn2 EXON2 R      | CTGGCCACCCTAGCATCTCTCTT    |
| Nrsn2 EXON3 F      | GATGTTCTGTGAGGCCCATTTCA    |
| Nrsn2 EXON3 R      | AAGGTGATGAAAGCAAGGAGTGC    |
| Oct4 cDNA F        | AGACCACCATCTGTGCTTTC       |
| Oct4 cDNA R        | GGTCTCCAGACTCCACCTCA       |
| Odf1 cDNA F        | AGATCCTCTGGGCGATTCT        |
| Odf1 cDNA R        | TGATGTTCCGGGTGTGAGAGA      |

|                      |                           |
|----------------------|---------------------------|
| Plzf cDNA F          | GAGCACACTCAAGAGCCACA      |
| Plzf cDNA R          | GTGGCAGAGTTTGCCTCAA       |
| Prm2 cDNA F          | GAAGGCGGAGGAGACTC         |
| Prm2 cDNA R          | GGGAGGCTTAGTGATGGTG       |
| Pxmp4 cDNA 1187R     | GGCTCCAGAACTTCTCAGCAGAAT  |
| Pxmp4 cDNA 13F       | AGCCAGGACCCTTGACCGAGTG    |
| Pxmp4 cDNA 514F      | CCTTGACACTGCGGTGATTTG     |
| Pxmp4 cDNA 612R      | AGAGGTAGGTCATGGAGGACTGT   |
| Rbck1 cDNA 1193F     | ACCGAACCTACTGAGTGCCCTGT   |
| Rbck1 cDNA 1362R     | GGGCATGAGTAGGTGCTGTCAAT   |
| Rbck1 cDNA 1585F     | GCACATGAATTGCAGGGAGTACC   |
| Rbck1 cDNA 1789R     | GACCCAGCAGATCTCAGTGTGG    |
| Rbck1 cDNA 2065R     | GCTCAGCTGGGTCCCTTGTAACAC  |
| Rbck1 cDNA 268F      | GGGCAGAGTTGCTTCTACCTTCC   |
| Rbck1 cDNA 772F      | CAACACGTCACTCAACCCACAAG   |
| Rbck1 cDNA 845R      | CCTTGAAGCCCAAATCTTCCAAC   |
| Rhox1 cDNA F         | AATGTGGCCTCAGCAACAG       |
| Rhox1 cDNA R         | TCTGCACTTTGGCTTCACAC      |
| Rhox8 cDNA F         | AGGAACTGGAGCGCATT         |
| Rhox8 cDNA R         | TCAGGCATTTCTGTATTTGG      |
| rs13476843 F (436bp) | CCCTTGTTTTGAGCCTCTGATCC   |
| rs13476843 R         | GCGTTCATCATATCCCATCAAC    |
| rs27343693 156F      | TGCATGGAACCATCTTTTCAAAC   |
| rs27343693 627R      | TGCTAACTCAGCATTGGGTGATG   |
| rs27343701 F (497bp) | TTGGAAGTAATCATTTGCCATCAA  |
| rs27343701 R         | GTTGGTTAGGTGCCAACCACCTT   |
| rs27343710 F (461bp) | TGTCCACAAAGCAGCAGGCTTAC   |
| rs27343710 R         | TCCCCAAACAACCTACCACCAA    |
| rs27343711 F (499bp) | GCCTGTTCCAGCCAATGTTTTCAA  |
| rs27343711 R         | CGTTCAGTGTTTGGGTCAGC      |
| rs27343713 F (486bp) | CCATGACTACACACATCAGACACC  |
| rs27343713 R         | TTTGAAAACATTGGCTGAACAGG   |
| rs27343715 F (383bp) | CCATGACTACACACATCAGACACC  |
| rs27343715 R         | GAAGGTAGGTGAAGGCAGGAGGA   |
| rs27343718 F (500bp) | TCCTCCCAAAGTACACACTCAAACA |
| rs27343718 R         | AAAGAAACACGCAAGGTGATTGC   |
| rs27343720 F (456bp) | GCACATCCATAAACACCGCATT    |
| rs27343720 R         | TGGCAGGGAAGTTTGTAAAGTGA   |
| rs27343745 F (458bp) | CAAGGAAAACATGTCATGGACAGA  |
| rs27343745 R         | GGCTTCTTCCACTCAAAGATACA   |
| rs27343764 F (483bp) | CTTAGTGATGCCTGGGCTCTG     |

|                      |                             |
|----------------------|-----------------------------|
| rs27343764 R         | TCAGTCATTGTGAGAAATGCAAGG    |
| rs27343765 209F      | CCTCCCAAGTGCTGGGATTAAG      |
| rs27343765 663R      | AAAAATGGGAGGGGAGGAGGAG      |
| rs27343795 F (466bp) | CACATCAGGCAGCTCCAAGGTAT     |
| rs27343795 R         | CCTAAGGGGTAAGCCAGAGTTGC     |
| rs27343842 F (495bp) | GGCCACTAGGTGGTACTTCAAATCC   |
| rs27343842 R         | TGTTCAATTTGATGTCTCAGAGCAGTG |
| rs27343856 F         | CATTATCTCTGCCTCCCCAAAT      |
| rs27343856 R         | CCCTGAGGGATGATGAAACACAC     |
| rs27343878 F (447bp) | AGAAGCTTGGCCTTCGTCTTACG     |
| rs27343878 R         | ATCTCCCAATGCCACGACTACT      |
| rs27369967 F         | TGAGCTGTACATGGTAGGCTGGA     |
| rs27369967 R         | GCCAAGACTTCCTCCTGGTCAAA     |
| rs27371881 F         | TTGTTTTTACCTCATGACACAGC     |
| rs27371881 R         | CCTGGACTGTGCTAGGTGATGCT     |
| rs27372130 F (484bp) | AGCTACCCAACACTACAGCCAGGTG   |
| rs27372130 R         | CAACAACAAACCCACCCCTACAA     |
| rs27385374 F         | GCCCAGGCTGTCAATAAGCTTTC     |
| rs27385374 R         | TCCCCTCTTTGACCACATCCTAA     |
| rs27385459 F (407bp) | AACTTCTGATCCTTCCCAAGTGC     |
| rs27385459 R         | GTCCTGGATCTCAAGGGAGAAGC     |
| rs27385480 F (463bp) | TGAGGATCAGAGAAAGGTAGAAGGACA |
| rs27385480 R         | GAGTTGGTGTCTGTGGCCTTGAG     |
| rs27385624 F (459bp) | CTGGCCTCACCAACACTTGTACC     |
| rs27385624 R         | TTACCAGACGTTGCCAACTAGC      |
| rs27385628 F (451bp) | TGGTGTTCCCGGGTATGACTGTA     |
| rs27385628 R         | CATCTCTCCAGCCCGTGTGTATC     |
| rs27385629 F (466bp) | TATCCCTGTAAGCCCTGCACTGA     |
| rs27385629 R         | GACCATGGAGGCCAGAAGAAGAC     |
| rs27385631 F (475bp) | TACGATCCCAGCACCTCAGAGAC     |
| rs27385631 R         | GCAGCCACACAGGATTACTGTCA     |
| rs27385649 F (465bp) | ACTCTTGGGGCTGATTTTCAAGC     |
| rs27385649 R         | CCATCTACAGCTTCTGCCCACTG     |
| rs27385651 F (492bp) | GCTCTGGAGACAAGGACCCATCT     |
| rs27385651 R         | CAGCACTCCGGACGCAGA          |
| rs27385663 F (456bp) | GAGCATCTTATGTCGCCACTGCT     |
| rs27385663 R         | TGCAGTTCTCCTATTCCCTCTGC     |
| rs27385665 F (494bp) | TCCAGAGGAGTGTGTTGTTGGACTG   |
| rs27385665 R         | GAAATGTGAGGACCCAAGGTTCA     |
| rs27403426 147F      | GGGCAGTTATCATAGGGCCTCAC     |
| rs27403426 610R      | TTGTTTACTAGACCGAGGCGGTAA    |

|                     |                          |
|---------------------|--------------------------|
| rs6247849 F (487bp) | GTGGAGGGTCTGGAGAGATGTT   |
| rs6247849 R         | GCTGCCAAAATCAAAAACACTGC  |
| Scp3 cDNA F         | CAACAACAAAAGATTTTTTCAGCA |
| Scp3 cDNA R         | TTTGCAACATAGCCATTTCTTTT  |
| Scrt2 Exon 1F       | CTGGGAGCTGTCCAGTGCTGAAG  |
| Scrt2 Exon 1R       | ACCCTGCCACTTTTCCTTTGTACG |
| Scrt2 Exon 2.1F     | CATGGACAGAACTGAGCCAACCT  |
| Scrt2 Exon 2.1R     | CGTACGTCTTGCCGCACTCTGC   |
| Scrt2 Exon 2.2F     | TGGACGCCTTCTTCATCTCTGAC  |
| Scrt2 Exon 2.2R     | GCAGTGCTTGTGGAGGTAGGACT  |
| Scrt2 Exon 2.3F     | ATGCACGTGCTCACGCACAACCT  |
| Scrt2 Exon 2.3R     | GACAAAGTGGGTGGGTGCGAAG   |
| Sox12 cDNA 1017R    | GTCCTCGGACAGGGTTCGGAGAGG |
| Sox12 cDNA 1210F    | GACTATTGCACCCCCGAGGTTA   |
| Sox12 cDNA 1368R    | CCGAGGGGGCCCAATACCTGAT   |
| Sox12 cDNA 1454R    | GGGAGGGGTATGTCTGGATTTGT  |
| Sox12 cDNA 1605R    | AGTGAGGGGGAGGGGTAAAGGTA  |
| Sox12 cDNA 172F     | ACTGACCTCCCCCTCGCACAGAC  |
| Sox12 cDNA 448F     | AAGACCCCGAGCGGCCACATTA   |
| Sox12 cDNA 519F     | AATCATGGACCAGTGGCCCGACA  |
| Sox12 cDNA 536R     | GGCCACTGGTCCATGATTTTTTC  |
| Sox12 cDNA 615R     | GAACGGGATCTTCTCCGAGTCCT  |
| Sox12 cDNA 651F     | GGCGGACTACCCGGACTACAAGT  |
| Sox12 cDNA 679R     | GCCGGTACTTGTAGTCCGGGTAG  |
| Sox12 cDNA 81F      | TCCTTGGCCCTGCAAAAACAA    |
| Sox12 cDNA 870F     | GGAAGTACGCCTGCTGGAGACC   |
| Srxn1 cDNA 1F       | AAGGAAGAGGTATGGGGCTACGC  |
| Srxn1 cDNA 382R     | AGGTCTGAAAGGGTGGACCTCAC  |
| Srxn1 Exon 1.3F     | CTCGGGGACAGGTAGGATCACAG  |
| Srxn1 Exon 1.3R     | CAGTCCGTCAAGGTCACACAGG   |
| Stra8 cDNA F        | GCTTTTGACGTGGCAAGTTT     |
| Stra8 cDNA R        | AACACAGCCAAGGCTTTTGA     |
| Tbc1d20 cDNA 1080F  | CTTTGAGCTGGCATCAACTCAGC  |
| Tbc1d20 cDNA 1174R  | GGACATCTTTTGTTCGAGCCTCA  |
| Tbc1d20 cDNA 1573R  | GGCCCAACTTTTTAGGCAGTGAC  |
| Tbc1d20 cDNA 16F    | GCCGAAGTGGGGTTAGGT       |
| Tbc1d20 cDNA 1F     | GAAGTGGGGTTAGGTCCGTGGT   |
| Tbc1d20 cDNA 335R   | CTGGTGTTTACGTTGAGGAGCTT  |
| Tbc1d20 cDNA 374F   | TGAGCAAGGACTACCAGCAA     |
| Tbc1d20 cDNA 505R   | GATCCAGGACGAGGAGGAT      |
| Tbc1d20 cDNA 683F   | TCATTGACCAAGTGAGCCCAGAG  |



|                              |                                     |
|------------------------------|-------------------------------------|
| Tbc1d20 cDNA 873R            | CACGATCACAGCTGCAAAGT                |
| Tbc1d20 del1659-1670F        | TTGGGCACGTCCTGATGGACTTGAGGTTATACG   |
| Tbc1d20 del1659-1670R        | CGTATAACCTCAAGTCCATCAGGACGTGCCAA    |
| Tbc1d20 E6/cDNA F (109bp)    | CAGCTGGCTTATCACCTGGTTTG             |
| Tbc1d20 E6/cDNA R (109bp)    | TGCAAAGTAAATGGGCATAAGT              |
| Tbc1d20 Exon 6 F             | CCTGGCTTCGTGGTACATTTTTG             |
| Tbc1d20 Exon 6 R             | AGATCACGGATCAAGTTGGATGG             |
| Tbc1d20 ORF 1128R            | CACCGTCAGCCCCATCACT                 |
| Tbc1d20 ORF 353F             | GAGAAGGGCTCCAGGAAGAGCTA             |
| Tbc1d20 ORF 468R             | CACCACCAGCAGAAATGTGACC              |
| Tbc1d20 ORF 731F             | GCCACCCACTTATGCCCATTTAC             |
| Tbc1d20 ORF 849R             | CTGAGGGATCTGGGACAACAGGT             |
| Tbc1d20 ORF Fwd (no ATG)     | GCCCTCCGGCCCTCAAAG                  |
| Tbc1d20 ORF Fwd (w/ATG)      | ATGGCCCTCCGGCCCTC                   |
| Tbc1d20 ORF Rev (21nt)       | TTAGGGGAACAGCTGCAGCTG               |
| Tbc1d20 ORF Rev (22nt)       | TTAGGGGAACAGCTGCAGCTGG              |
| Tbc1d20 t691a                | GGCACGTCCTGATGGACATGAGGTTATACGACTTC |
| Tbc1d20 t691a antisense      | GAAGTCGTATAACCTCATGTCCATCAGGACGTGCC |
| Tbc1d20 w/STOP; + 5' XbaI R  | GGATCCTCTAGATTAGGGGAACAGCTGCAGCTGG  |
| Tbc1d20: no ATG; + 5' NotI F | AAGCTTGCGGCCGCGGCCCTCCGGCCCTCAAAG   |
| Tbc1d20: w/STOP; + 5' XbaI R | GGATCCTCTAGATTAGGGGAACAGCTGCAGCTG   |
| Tcf15 cDNA 257F              | AGACCGCACGCAGAGCGTGAAC              |
| Tcf15 cDNA 324F              | GACCGAAAGCTGTCTAAGATCGAG            |
| Tcf15 cDNA 433R (Exon 1)     | AAACACGGCTGCCCGTCGTC                |
| Tcf15 cDNA 54F (Exon 1)      | GTGCTGTACCCGGACGTGAG                |
| Tcf15 cDNA 623R              | AAAACCAGGGATCCAGGTTTCATC            |
| Tcf15 cDNA 656R              | TCATGGCCTCTTTCTCTGGAGTC             |
| Tcf15 Exon 1.4F              | CTGAGCGAGGACGAGGAGAACC              |
| Tcf15 Exon 1.4R              | CTTAGCTTCCATGGGGGTACCTG             |
| Tcf15 EXON2 F                | GCCTTTTCAGCAGACTCACC                |
| Tcf15 EXON2 R                | GCAAGTCTCATTGTCCACTGC               |
| Tnp1 cDNA F                  | ACAAGGGCGTCAAGAGAGGT                |
| Tnp1 cDNA R                  | CATCACAAGTGGGATCGGTA                |
| Trib3 cDNA 1091R             | AGGAGACAGCGGATCAGACAGC              |
| Trib3 cDNA 1349R             | CTTGGCCCAAAAAGTCAGGAGA              |
| Trib3 cDNA 370F              | TCAGACTTGTCACCTGCTGTGG              |
| Trib3 cDNA 440R              | CCTTGCTCTCGTTCCAAAAGGAT             |
| Trib3 cDNA 58F               | CAGCACTTTAGCAGCGGAAGAGG             |
| Trib3 cDNA 595F              | CGGCTCCTTTACATCTTTTTACAG            |
| Trib3 cDNA 769R              | CAAAGCGACGCAGCTTGAGGTC              |
| Trib3 cDNA 872F              | CTGCCTACGTGGGACCAGAGATA             |

|                   |                         |
|-------------------|-------------------------|
| Zcchc3 cDNA 1003F | AGGTCCAGCCTGAAGACCCTCT  |
| Zcchc3 cDNA 1025R | AAGAGGGTCTTCAGGCTGGACCT |
| Zcchc3 cDNA 130F  | CCAGAAGCGTCGGGTTTCAGAG  |
| Zcchc3 cDNA 1335R | CTCTTCCCCGCACCTGAAACAC  |
| Zcchc3 cDNA 1381R | AGAGGTTGCACACGATGACCTTC |
| Zcchc3 cDNA 1574R | TCTCCATTCAAACGATTAATAA  |
| Zcchc3 cDNA 563F  | ACCCTACGGGTGAGGCGTCAGA  |
| Zcchc3 cDNA 610R  | CGCTCGCGCTCTTTTTCCTGTA  |
| Zcchc3 cDNA 890F  | AGTTCGACGTGAGTTTCCGATCC |
| Zcchc3 cDNA 941F  | TCTACGAGGAGAAGCGAGAGCTG |

**Table S3. Human primer sequences**

| Primer target:               | Primer sequence 5'->3':                                                                |
|------------------------------|----------------------------------------------------------------------------------------|
| <i>TBC1D20</i> coding exon 1 | GTAGCGCGACGGCCAGTCCCTCAGCCTGTTCCCTCTC<br>CAGGGCGCAGCGATGACGAGCGGGTGCTACGTCC            |
| <i>TBC1D20</i> coding exon 2 | GTAGCGCGACGGCCAGTCCCTTGGTTTGAAAGGACC<br>CAGGGCGCAGCGATGACGCTAAGAGGAGATACTTACCTGTACC    |
| <i>TBC1D20</i> coding exon 3 | GTAGCGCGACGGCCAGTAGGAGAGCTCTGAAGGTCCC<br>CAGGGCGCAGCGATGACGCCCTCTAGGCCTTTTGTG          |
| <i>TBC1D20</i> coding exon 4 | GTAGCGCGACGGCCAGTTTAGATCAGGGCTCAGGGTG<br>CAGGGCGCAGCGATGACTGGATCTTGATATGCGTTGC         |
| <i>TBC1D20</i> coding exon 5 | GTAGCGCGACGGCCAGTACAATGAGGAAACTGCGCTC<br>CAGGGCGCAGCGATGACAACACTGACCTGTTTTCTG          |
| <i>TBC1D20</i> coding exon 6 | GTAGCGCGACGGCCAGTTGCATCTTTCCATAATCCCC<br>CAGGGCGCAGCGATGACTCCTAAATGCTTCCTTCTCACC       |
| <i>TBC1D20</i> coding exon 7 | GTAGCGCGACGGCCAGTCCAACCCTATCCCACCAG<br>CAGGGCGCAGCGATGACAACATTTGGGCTGAGTCCTG           |
| <i>TBC1D20</i> coding exon 8 | GTAGCGCGACGGCCAGTTAAAGGCAAACACAAACGGG<br>CAGGGCGCAGCGATGACGAGCTTAGGCCAGTGGAAATC        |
| <i>RAB1A</i> coding exon 1   | GTAGCGCGACGGCCAGTCTCGACCCCTTTAAGATCCC<br>CAGGGCGCAGCGATGACGTTTCTTTCGATTACCCGTGG        |
| <i>RAB1A</i> coding exon 2   | GTAGCGCGACGGCCAGTCCAAGATACCACTGGGGATG<br>CAGGGCGCAGCGATGACGTGTGGCTGTTTGCAGTTTTG        |
| <i>RAB1A</i> coding exon 3   | GTAGCGCGACGGCCAGTAAAGATGAGGACCAAGTTTGAC<br>CAGGGCGCAGCGATGACGAAAGTGGATGGAGTGGCTG       |
| <i>RAB1A</i> coding exon 4   | GTAGCGCGACGGCCAGTGACATTAATCAAATAATGGCTTCCTAC<br>CAGGGCGCAGCGATGACGATTTCCCCTCCCTCCTACAC |
| <i>RAB1A</i> coding exon 5   | GTAGCGCGACGGCCAGTCATAATGGAGCGTGAGGAAC<br>CAGGGCGCAGCGATGACGTCTGTTAGGTCAGGAACGATG       |
| <i>RAB1A</i> coding exon 6   | GTAGCGCGACGGCCAGTTTTCACTTGGGTTTCAAGATTGC<br>CAGGGCGCAGCGATGACGCCATTATGGATGGTAGAAATGC   |
| <i>RAB1B</i> coding exon 1   | GTAGCGCGACGGCCAGTAGTGATGGGAGTGGGCG<br>CAGGGCGCAGCGATGACAAGAGGGACCCGGATGTG              |
| <i>RAB1B</i> coding exon 2   | GTAGCGCGACGGCCAGTTGACAGAGTGAGACCTTATTGC<br>CAGGGCGCAGCGATGACTACAGCTTACCCCTGGTTC        |
| <i>RAB1B</i> coding exon 3   | GTAGCGCGACGGCCAGTCAGCTGAGTGCTGGGAATTG<br>CAGGGCGCAGCGATGACCGCTGTGTCCCCTAGGAG           |
| <i>RAB1B</i> coding exon 4   | GTAGCGCGACGGCCAGTGTGTGCTCTTCCCAAAATC<br>CAGGGCGCAGCGATGACTCCAGGAAGCATCAGGAAAG          |
| <i>RAB1B</i> coding exon 5   | GTAGCGCGACGGCCAGTCTGAGCCCAGGACTTAAGGG<br>CAGGGCGCAGCGATGACGCAAACCTGACAAGGGAG           |
| <i>RAB1B</i> coding exon 6   | GTAGCGCGACGGCCAGTAACACCACAGCCAAGGTAGC<br>CAGGGCGCAGCGATGACACCCCAAAGCCACAGACTC          |
| <i>RAB2A</i> coding exon 1   | GTAGCGCGACGGCCAGTGTTCGAGGCTGAGCGG<br>CAGGGCGCAGCGATGACACTGCGGAAATGGAGCG                |
| <i>RAB2A</i> coding exon 2   | GTAGCGCGACGGCCAGTCCCTGGCTGCCTCTTTTC<br>CAGGGCGCAGCGATGACAACAGCGTAACAACAAATCCAG         |
| <i>RAB2A</i> coding exon 3   | GTAGCGCGACGGCCAGTCATGTCTTGGAAAGTAAACATTCTG<br>CAGGGCGCAGCGATGACATGGCTGCAGGAAGTCAGTG    |

|                            |                                                                                          |
|----------------------------|------------------------------------------------------------------------------------------|
| <i>RAB2A</i> coding exon 4 | GTAGCGCGACGGCCAGTTTTATGCACTCCTTCCCTACC<br>CAGGGCGCAGCGATGACCGGGGCAGAAAGGCTAAG            |
| <i>RAB2A</i> coding exon 5 | GTAGCGCGACGGCCAGTTGGATATGGCTAAAAGTGGTTC<br>CAGGGCGCAGCGATGACTTTTTATAATTTAAGAGGCTGGTAACTC |
| <i>RAB2A</i> coding exon 6 | GTAGCGCGACGGCCAGTTGGTACACTTTCCACAAATGC<br>CAGGGCGCAGCGATGACTGATGTTCAAAGACCATCCG          |
| <i>RAB2A</i> coding exon 7 | GTAGCGCGACGGCCAGTAATATGTATTACGTCGATTGACTTTC<br>CAGGGCGCAGCGATGACTTGGATGACTGTAAACTAATGGTG |
| <i>RAB2A</i> coding exon 8 | GTAGCGCGACGGCCAGTATTGTTGCTAAAATCTACTTGCTG<br>CAGGGCGCAGCGATGACTGACGGATTAAGTCTTCTGTGAC    |
| <i>CSNK2A1</i> 3'UTR       | CCCATCTTGGCTTTAGTAACTTTATC<br>TTAGCGTCCTCTAAAGTTTACCATTAT                                |
| <i>TBC1D20</i> exon 2      | CACCAGGCTCTGAACAGTGAT<br>CTCCTTCACTGATAGCCATGC                                           |
| <i>TBC1D20</i> exon 4      | ATGCCAGAGGAACAGAGAGAA<br>TAGTGCAGCTGAGGGTTGC                                             |
| <i>TBC1D20</i> exon 6      | TGTCTGACTTCAGGCACGTC<br>AAAGTAAATCGGCATCAGTGG                                            |
| <i>TBC1D20</i> exon 7      | CCTCAGGACTTGCCCTATGA<br>TGGGGGAAACTGAACAAAA                                              |
| <i>TBC1D20</i> exon 8      | AGTGATGGGGCTGACAGTG<br>CCATTCCAGGGCACTTTTC                                               |
| <i>RBCK1</i> exon 5        | GGGTGCACCTTCATCAACA<br>TCGTCGGGCTGGTATGAG                                                |
| <i>RBCK1</i> exon 3        | CTTGCAGCAGTGGGTGATT<br>GTAGGCACTGTCCCCATTCT                                              |

**Table S4.** Clinical details of WARBM individuals with *TBC1D20* mutations.

| Individual                                                              | 1.1                                                                        | 1.2                                                                        | 2                                   | 3.1                                                                     | 3.2                                                                     | 4                                                                                             | 5                                                         |
|-------------------------------------------------------------------------|----------------------------------------------------------------------------|----------------------------------------------------------------------------|-------------------------------------|-------------------------------------------------------------------------|-------------------------------------------------------------------------|-----------------------------------------------------------------------------------------------|-----------------------------------------------------------|
| <i>TBC1D20</i> Mutation                                                 | c.199C>T<br>p.Arg67*                                                       | c.199C>T<br>p.Arg67*                                                       | c.292C>T<br>p.Gln98*                | c.352_353delCA<br>p.Gln118Glufs*9                                       | c.352_353delCA<br>p.Gln118Glufs*9                                       | c.672G>A<br>p.Trp224*                                                                         | Deletion<br>exons 2-8                                     |
| Sex                                                                     | Male                                                                       | Female                                                                     | Female                              | Female                                                                  | Female                                                                  | Male                                                                                          | Female                                                    |
| Ethnic origin                                                           | Polish                                                                     | Polish                                                                     | Dutch                               | Pakistani                                                               | Pakistani                                                               | Egyptian                                                                                      | Pakistani                                                 |
| Consanguinity                                                           | Non-consanguineous (but families originate from a common small village)    | Non-consanguineous (but families originate from a common small village)    | Distant consanguinity               | Non-consanguineous (but families originate from a common small village) | Non-consanguineous (but families originate from a common small village) | First cousin                                                                                  | First cousins                                             |
| Current age (at assessment)                                             | 21 years                                                                   | 16 years                                                                   | 6 years                             | 13 years                                                                | 11 years                                                                | 14 years                                                                                      | 15 years                                                  |
| Head circumference                                                      | 50cm<br>(-4.11SD)                                                          | 51cm<br>(-3.15SD)                                                          | 47 cm<br>(-4.54SD).                 | 50,5cm<br>(-3.11SD)                                                     | 50cm<br>(-3.17SD)                                                       | Age 14:<br>47.5<br>(-5.03SD)<br>Age 9:<br>46.2 cm<br>(-5.02SD)                                | 49cm<br>(-4.50SD)                                         |
| Height                                                                  | Not recorded as difficult to measure accurately due to severe contractures | Not recorded as difficult to measure accurately due to severe contractures | 100cm<br>(-3.81SD)                  | 132cm<br>(-3.29SD)                                                      | 122cm<br>(-3.21SD)                                                      | Age 14:<br>120 cm<br>(-5.06SD)<br>Age 9:<br>100cm<br>(-5.71SD)                                | 10 months:<br>66cm<br>(-2.34SD)<br>Otherwise not recorded |
| Weight                                                                  | Age 15:<br>28 kg<br>(-9.92SD)                                              | Age 6:<br>13 kg<br>(-3.75SD)                                               | Not recorded                        | 20 kg<br>(-5.17SD)                                                      | 18 kg<br>(-4.53SD)                                                      | Age 14:<br>18kg (-6.52SD)<br>Age 9:<br>16kg<br>(-5.08SD)                                      | 24.5kg<br>(-6.04SD)                                       |
| Pregnancy (any problems)                                                | No                                                                         | No                                                                         | No                                  | Not recorded                                                            | Not recorded                                                            | Pre-eclampsia                                                                                 | Placenta previa                                           |
| Gestation                                                               | 40 weeks                                                                   | 40 weeks                                                                   | 37 weeks                            | 40 weeks                                                                | 40 weeks                                                                | 36 weeks                                                                                      | 37 weeks                                                  |
| Birth weight                                                            | 2.2kg<br>(-2.93SD)                                                         | 2.2kg<br>(-2.82SD)                                                         | 2.6kg<br>(-0.47)                    | 2.2kg<br>(-2.82SD)                                                      | 2.57kg<br>(-1.91SD)                                                     | 2kg<br>(-1.79SD)                                                                              | 2.4kg<br>(-0.99SD)                                        |
| Birth length                                                            | 49cm<br>(-1.02SD)                                                          | 48cm<br>(-1.19SD)                                                          | 45cm<br>(-1.53SD)                   | Not recorded                                                            | Not recorded                                                            | Not recorded                                                                                  | Not recorded                                              |
| Birth head circumference                                                | 32cm<br>(-2.52SD)                                                          | 33cm<br>(-1.25SD)                                                          | Not recorded                        | Not recorded                                                            | Not recorded                                                            | Not recorded                                                                                  | 31.5cm<br>(-1.03SD)                                       |
| Karyotype (please note any cytogenetic abnormalities detected on array) | 46, XY                                                                     | 46, XX                                                                     | 46,XX<br>Normal Array<br>CGH (105K) | 46, XX                                                                  | 46, XX                                                                  | 46,XY                                                                                         | 46 XX                                                     |
| Severe Postnatal growth retardation                                     | +                                                                          | +                                                                          | +                                   | +                                                                       | +                                                                       | +                                                                                             | +                                                         |
| Postnatal Microcephaly                                                  | +                                                                          | +                                                                          | +                                   | +                                                                       | +                                                                       | +                                                                                             | +                                                         |
| Developmental delay/ mental retardation                                 | Profound mental retardation                                                | Profound mental retardation                                                | Severe mental retardation           | Profound mental retardation with autistic features                      | Profound mental retardation                                             | Profound mental retardation with autistic features (thumb sucking, head banging and fear from | Severe mental retardation                                 |

|                              |                                                                                             |                                                                                                                                                            |                                                                                                                                                                                                                                                                                                                                                                                    |                                                                                                                                  |                                                                                                                                         |                                                                                                        |                                                                                                                                                                                                                                                                                                                                                      |
|------------------------------|---------------------------------------------------------------------------------------------|------------------------------------------------------------------------------------------------------------------------------------------------------------|------------------------------------------------------------------------------------------------------------------------------------------------------------------------------------------------------------------------------------------------------------------------------------------------------------------------------------------------------------------------------------|----------------------------------------------------------------------------------------------------------------------------------|-----------------------------------------------------------------------------------------------------------------------------------------|--------------------------------------------------------------------------------------------------------|------------------------------------------------------------------------------------------------------------------------------------------------------------------------------------------------------------------------------------------------------------------------------------------------------------------------------------------------------|
|                              |                                                                                             |                                                                                                                                                            |                                                                                                                                                                                                                                                                                                                                                                                    |                                                                                                                                  |                                                                                                                                         | noise or children)                                                                                     |                                                                                                                                                                                                                                                                                                                                                      |
|                              | No progress in developmental milestones (speech absent, no eye contact, reaction to sounds) | No progress in developmental milestones (speech absent, eye contact present, reaction to sounds)                                                           | 1 year 9 months: rolling.<br>2 years and 6 months: Recognized her parents and grandparents, Babbling, Hand wringing movements<br>Sitting for a short time but falls easily.<br>Age 5: Unable to sit on own, dress or feed herself.<br>At age 7 : Some words (mama, eat), and recognizes some words. Remembers things and shows it when she likes something.<br>Stands with support |                                                                                                                                  |                                                                                                                                         | 8 months: Head control<br>5 years: Sat with support<br>Never learnt to walk or talk                    | Smiled at 3 months<br>Rolled at 13 months.<br>15 months- claps, waves.<br>Pulled herself along the floor at 3 years.<br>At 15 years: Cannot sit without support.<br>Reaches out and takes objects.<br>Reasonable understanding , follows instructions, responds to questions.<br>Can feed herself if handed food.<br>Some single words, but unclear. |
| Axial Hypotonia              | Severe generalized hypotonia                                                                | Severe generalized hypotonia,                                                                                                                              | Yes                                                                                                                                                                                                                                                                                                                                                                                | Moderate- severe generalized hypotonia in the in first years of life; can sit alone and can reach sitting position or roll alone | Moderate- severe generalized hypotonia in the in first years of life; can sit alone but cannot reach the sitting position or roll alone | Yes                                                                                                    | Profound central hypotonia in the first years of life                                                                                                                                                                                                                                                                                                |
| Limb spasticity and reflexes | Decreased reflexes from upper and lower limbs. Flexion contractures of the knee and toes    | Elevated, symmetrical patellar reflexes, decreased other reflexes from upper and lower limbs. Babinski sign (+). Flexion contractures of the knee and toes | Hypertonia of legs and arms with hyperreflexia and pathological plantar responses. Limited flexion of hips at age 5; Subluxation of hips age 7                                                                                                                                                                                                                                     | Increased muscular tone, more severe at the lower limbs with fixed flexed posture of the knees (more severe than K4.2)           | Increased muscular tone, more severe especially the lower limbs with fixed flexed posture of the knees<br>Surgery for pes equino-varus  | At age 8 tendon release operation was done for spasticity<br>At age 14 upper and lower limb spasticity | Hypertonia in all four limbs, more marked in lower limbs, brisk reflexes, up going plantars, very limited flexion at ankles and hips.                                                                                                                                                                                                                |
| Nerve conduction studies     | Not performed                                                                               | Not performed                                                                                                                                              | Not performed                                                                                                                                                                                                                                                                                                                                                                      | At 3 and 5 years: Slow motor nerve conduction of the lower limbs                                                                 | At 3 years: Slow motor nerve conduction lower limbs                                                                                     | Not performed                                                                                          | Not performed                                                                                                                                                                                                                                                                                                                                        |
| Speech                       | Absent                                                                                      | Absent                                                                                                                                                     | Age 7: Very limited says some words (mama, eat), and recognizes some words                                                                                                                                                                                                                                                                                                         | Absent                                                                                                                           | 4-5 words                                                                                                                               | No                                                                                                     | Some single words, but unclear speech, understood by parents.                                                                                                                                                                                                                                                                                        |
| Walking                      | No                                                                                          | No                                                                                                                                                         | No                                                                                                                                                                                                                                                                                                                                                                                 | No                                                                                                                               | No                                                                                                                                      | No                                                                                                     | No                                                                                                                                                                                                                                                                                                                                                   |
| Seizures                     | Yes                                                                                         | Yes                                                                                                                                                        | No                                                                                                                                                                                                                                                                                                                                                                                 | Febrile seizures at 2 ys of age                                                                                                  | At 10 months status epilepticus                                                                                                         | No                                                                                                     | No                                                                                                                                                                                                                                                                                                                                                   |

|                                 |                                                                                                   |                                                                                                                     |                                                                                                                                                                                                                                     |                                                                                                                                                                                                |                                                                                                                              |                                                                                                                                      |                                                                                                     |
|---------------------------------|---------------------------------------------------------------------------------------------------|---------------------------------------------------------------------------------------------------------------------|-------------------------------------------------------------------------------------------------------------------------------------------------------------------------------------------------------------------------------------|------------------------------------------------------------------------------------------------------------------------------------------------------------------------------------------------|------------------------------------------------------------------------------------------------------------------------------|--------------------------------------------------------------------------------------------------------------------------------------|-----------------------------------------------------------------------------------------------------|
|                                 |                                                                                                   |                                                                                                                     |                                                                                                                                                                                                                                     |                                                                                                                                                                                                | with fever, then some episodes of febrile seizures, resolved by 3 years, no therapy                                          |                                                                                                                                      |                                                                                                     |
| EEG findings                    | Abnormal organization of the electric activity                                                    | Abnormal organization of the electric activity, generalized changes with spike, waves and spike-and-wave discharges | Not performed                                                                                                                                                                                                                       | Age 2:<br>Abnormal activity, multifocal paroxysmal activity at age                                                                                                                             | Abnormal organization of the electric activity, no paroxysmal activity                                                       | Age 5 normal:<br>No focal sharp waves or spikes, Background 3-7 c/sec mixture of theta and delta waves                               | Not performed                                                                                       |
| Brain imaging                   | Brain MRI scan at age 13ys: cortical atrophy, hypoplastic corpus callosum wide lateral ventricles | Brain MRI scan at age 3ys: cortical atrophy, hypoplastic corpus callosum                                            | Brain MRI at 2 ½ years: Bilateral frontoparietal PMG, bilateral occipital loss of white matter around posterior horns of the lateral ventricles, corpus callosum hypogenesis especially of the splenium, mild cerebellar hypoplasia | Brain MRI at 2 years: Bilateral frontoparietal PMG, Megacisterna magna Hypoplastic cerebellar vermis<br><br>At 4 years 11 months: Progressive cerebellar atrophy of the vermis and hemispheres | Brain MRI at 6 months and 2 years 8 months: Bilateral frontoparietal PMG, megacisterna magna, progressive cerebellar atrophy | Brain MRI scan at the age of 7 months: Bilateral frontoparietal PMG, cortical and central atrophy and hypogenesis of corpus callosum | Brain MRI at 19 months: Very minor degree of superior cerebellar vermian atrophy, otherwise normal. |
| Microphthalmia                  | Yes                                                                                               | Yes                                                                                                                 | Yes, short axial length (13.44 mm in the right eye and 12.72 in the left eye)                                                                                                                                                       | Not recorded                                                                                                                                                                                   | Not recorded                                                                                                                 | No                                                                                                                                   |                                                                                                     |
| Microcornea                     | Yes                                                                                               | Yes                                                                                                                 | Yes                                                                                                                                                                                                                                 | Not recorded                                                                                                                                                                                   | Not recorded                                                                                                                 | No                                                                                                                                   |                                                                                                     |
| Bilateral Congenital Cataracts  | +                                                                                                 | +                                                                                                                   | +                                                                                                                                                                                                                                   | +                                                                                                                                                                                              | +                                                                                                                            | +                                                                                                                                    | +                                                                                                   |
| Pinpoint Pupils                 | No                                                                                                | Yes                                                                                                                 | Not recorded                                                                                                                                                                                                                        | No                                                                                                                                                                                             | No                                                                                                                           | Age 4: Pinpoint pupils age 4<br>Age 14: Pupils were reactive to light with sluggish dilatation on mydriatic                          | Not pinpoint at 15 years, although small pupils noted on review at 2 years of age.                  |
| Glaucoma                        | Yes                                                                                               | Yes                                                                                                                 | Yes                                                                                                                                                                                                                                 | Yes                                                                                                                                                                                            |                                                                                                                              | Yes                                                                                                                                  | No                                                                                                  |
| Progressive optic nerve atrophy | Yes                                                                                               | Yes                                                                                                                 | Pale, oblique implanted optic nerves                                                                                                                                                                                                | Pale papilla                                                                                                                                                                                   | Pale papilla                                                                                                                 | Normal optic nerves age 5                                                                                                            | Bilateral pale discs.                                                                               |
| ERG                             | Not performed                                                                                     | Not performed                                                                                                       | Not performed                                                                                                                                                                                                                       | Normal at 5 years                                                                                                                                                                              | Moderate delay in the major components                                                                                       | Not done                                                                                                                             | No recordable responses at 6 months                                                                 |
| VEP                             | Not performed                                                                                     | Not performed                                                                                                       | Not performed                                                                                                                                                                                                                       | Irregular morphology of the evoked cortical response; delay                                                                                                                                    | Irregular morphology of the evoked cortical response; delay                                                                  | Age 5: VEP studies showed intact visual                                                                                              | No recordable responses at 6 months                                                                 |

|                                                |                                       |                   |                                                                                                   |                                                                                                   |                                                                                    |                                                                                          |                                                   |
|------------------------------------------------|---------------------------------------|-------------------|---------------------------------------------------------------------------------------------------|---------------------------------------------------------------------------------------------------|------------------------------------------------------------------------------------|------------------------------------------------------------------------------------------|---------------------------------------------------|
|                                                |                                       |                   |                                                                                                   | in the major components                                                                           | in the major components                                                            |                                                                                          |                                                   |
| Vision                                         | Severely impaired                     | Severely impaired |                                                                                                   | Severely impaired                                                                                 | Severely impaired                                                                  |                                                                                          | Severely impaired                                 |
| Hypogonadism (state which abnormalities noted) | Small penis, bilateral cryptorchidism | Not apparent      | Not apparent                                                                                      | Not apparent                                                                                      | Not apparent                                                                       | Small penis and, hypoplastic scrotum with right undescended testis and small left testis | Not apparent                                      |
| Feeding difficulties                           | Yes                                   | Yes               | No                                                                                                | Yes                                                                                               | Reduced appetite                                                                   |                                                                                          | Gastroesophageal reflux as a baby, now eats well  |
| Sleep abnormalities                            | Yes                                   | Yes               | Yes                                                                                               | Yes                                                                                               | Yes<br>Frequent nocturnal awakenings                                               |                                                                                          | No, sleeps well.                                  |
| Facial features                                |                                       |                   | Nevus of unna on the forehead, deep set eyes, scarce peri-orbital fat, normal ears, normal palate | Brachycephaly, deep set eyes, ptosis, prominent nasal bridge, low anterior hairline and hirsutism | Brachycephaly, deepset eyes, ptosis, prominent nasal bridge, low anterior hairline | Prominent nose with anteverted nostrils and long philtrum.                               | High nasal bridge, deep set eyes, prominent chin. |
| Other                                          |                                       |                   | Thin teeth enamel, with brown looking dentin<br>Left convex scoliosis                             | Right renal agenesis                                                                              | Normal abdominal and heart scan                                                    | Hyperextensibility in the wrist joints and elbows                                        | Nystagmus.<br>Dental crowding.                    |
